# Supplementary material for: The microtubule poison vinorelbine kills cells independently of mitotic arrest and targets cells lacking the APC tumour suppressor more effectively
Source: Oxford University Press journal article supplement (doi:10.1242/jcs.091843), 2012-02-15

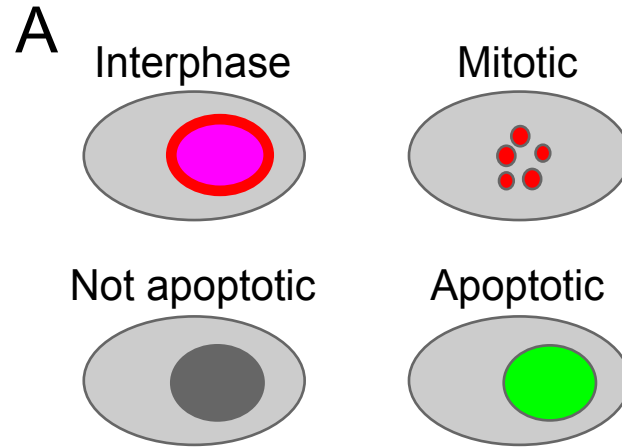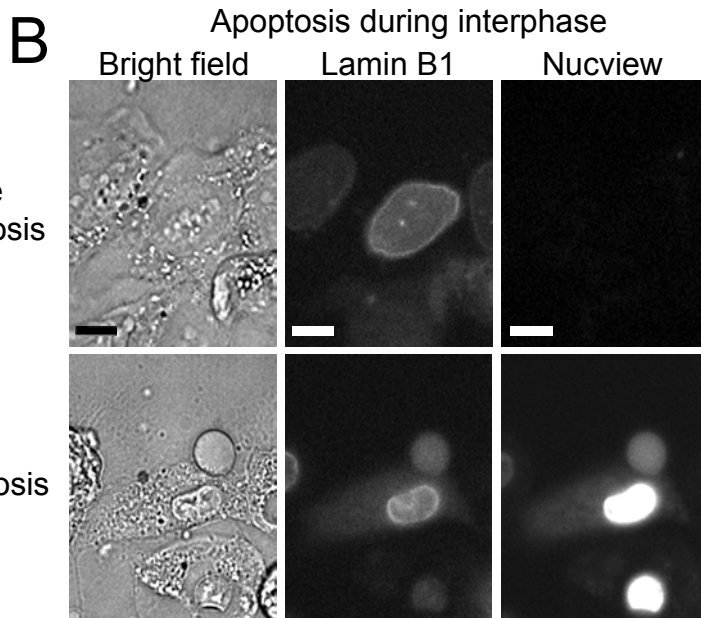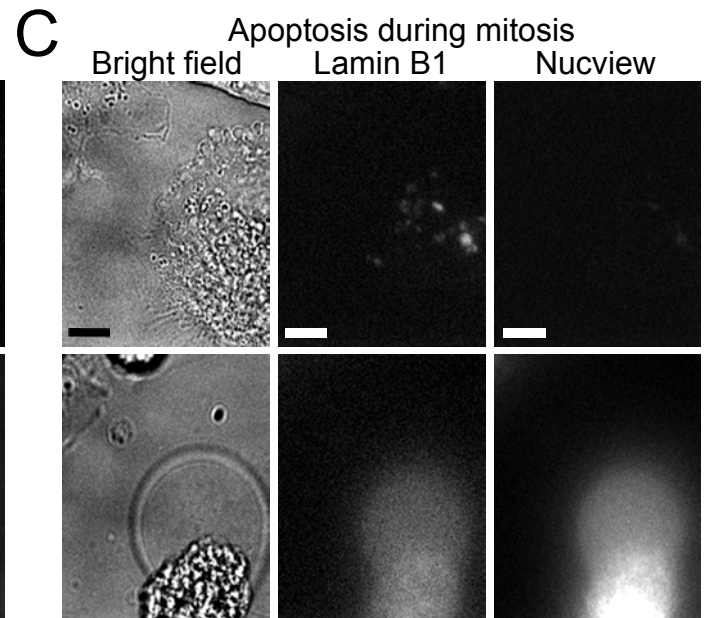

Acetylated Tubulin

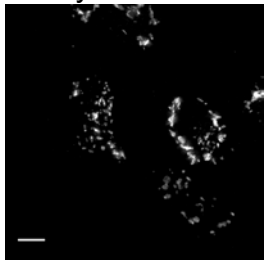

Tubulin

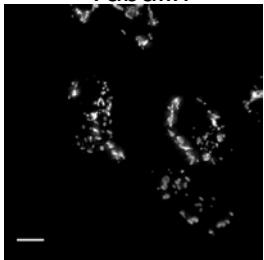

Merged

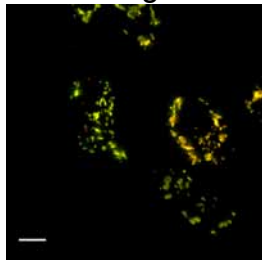

APC

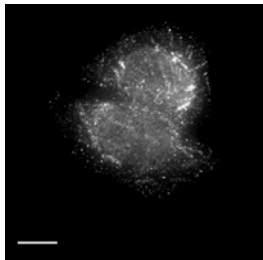

Tubulin

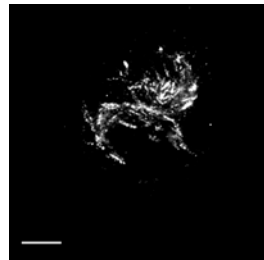

Merged

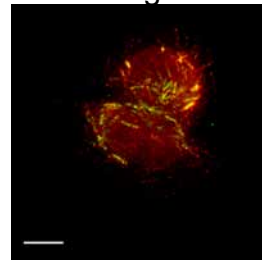

Clip170

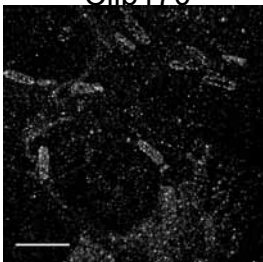

Tubulin

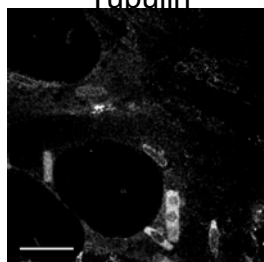

Merged

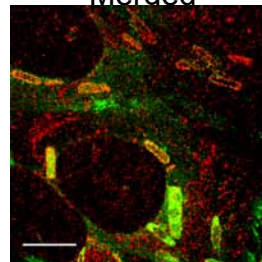

Map2

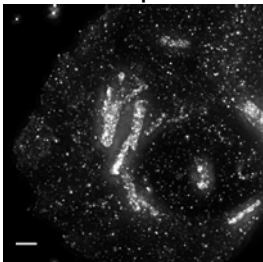

Tubulin

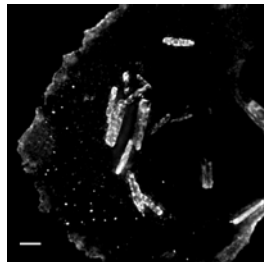

Merged

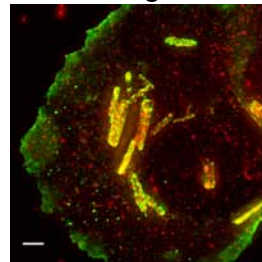

Clasp1

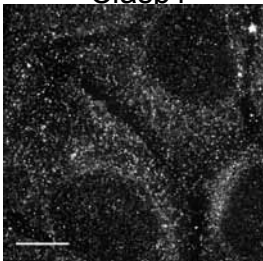

Tubulin

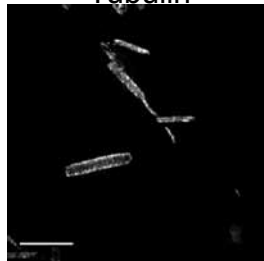

Merged

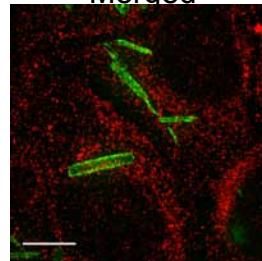

EB1

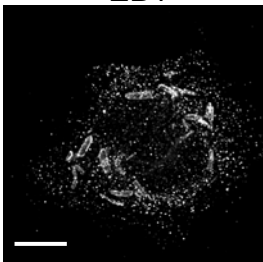

Tubulin

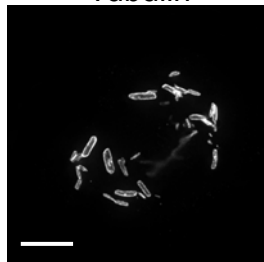

Merged

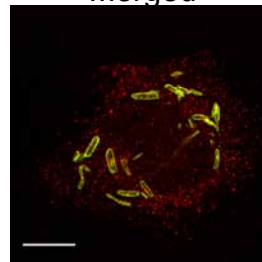

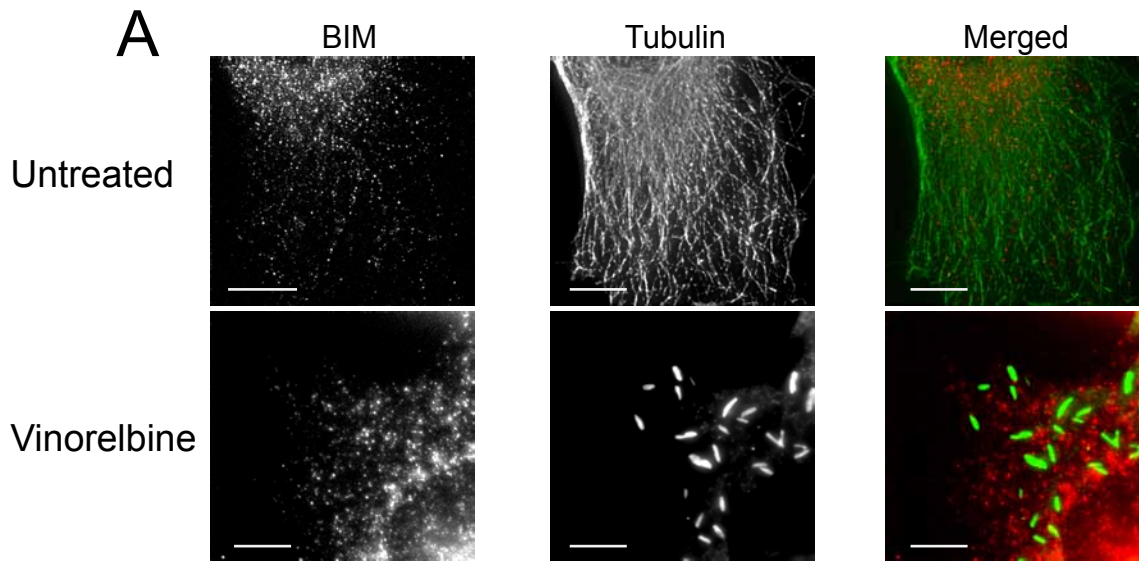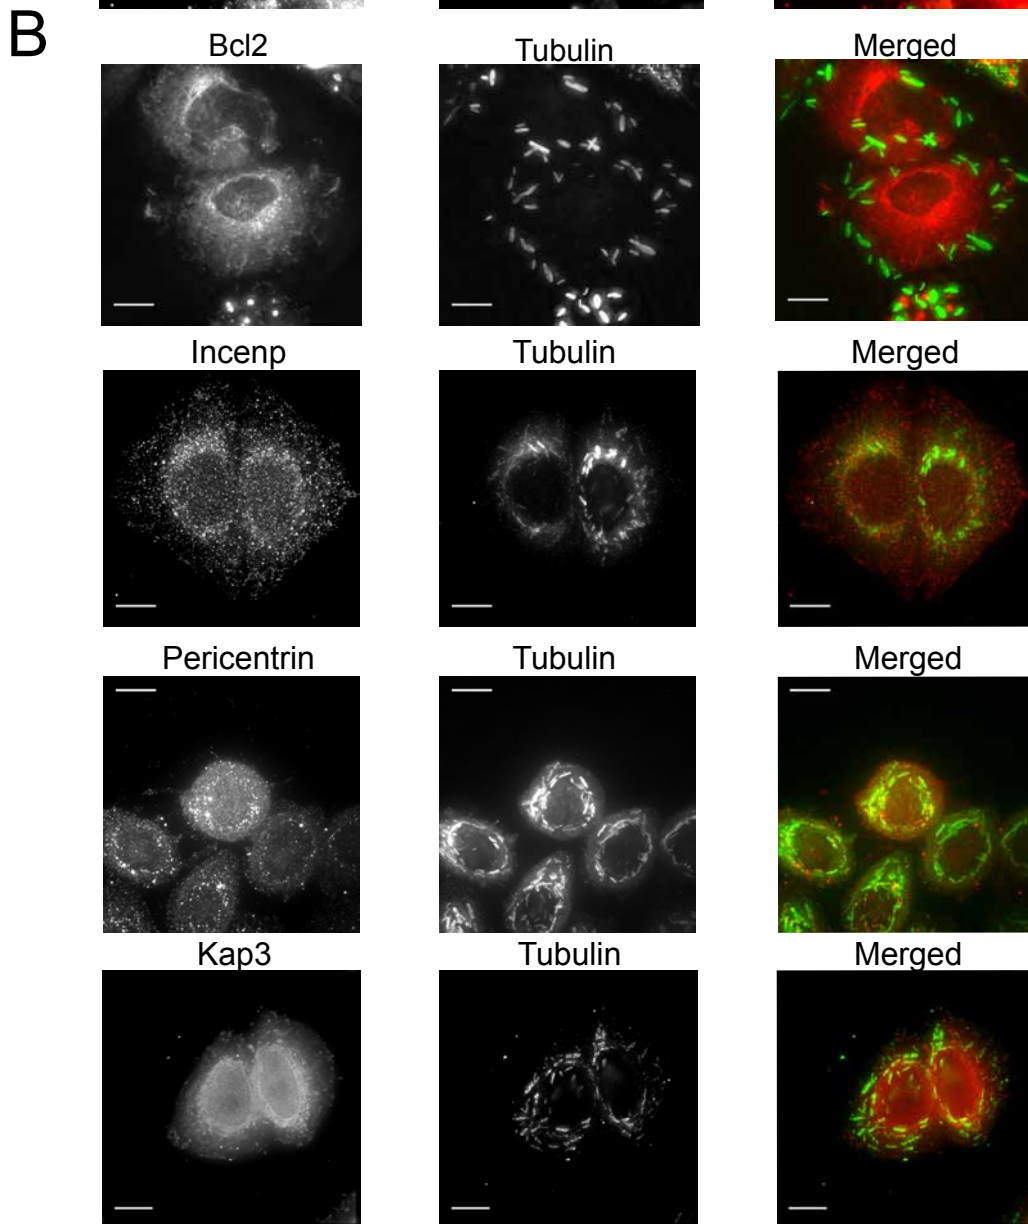

**A**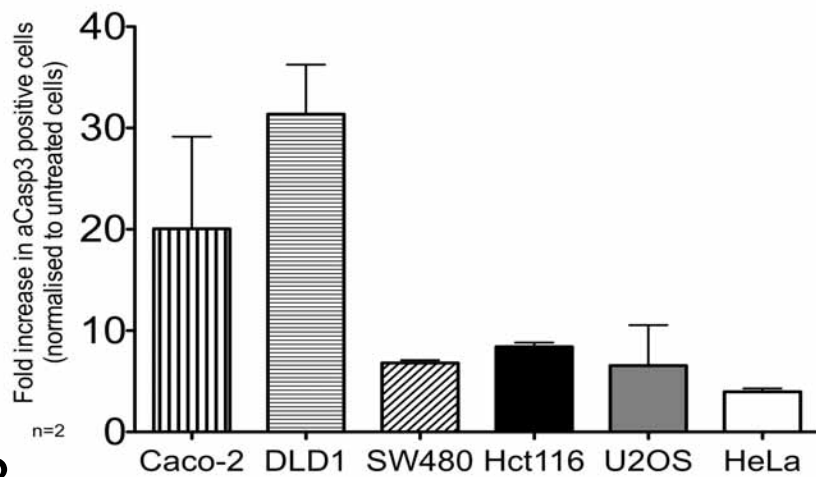**B**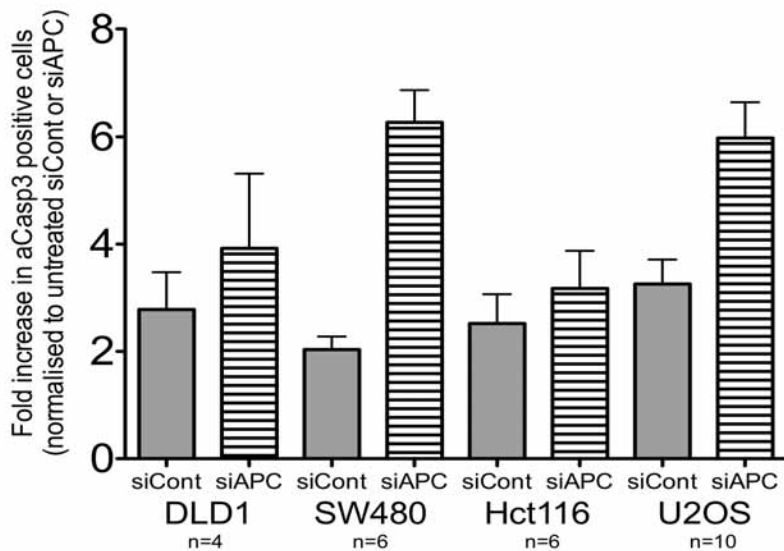

Supplement: jcs091843figs1-s4.pdf [file jcs091843figs1-s4.pdf]
